# Supplementary material for: A power comparison of generalized additive models and the spatial scan statistic in a case-control setting
Source: Springer Nature journal article supplement (doi:10.1186/1476-072x-9-37), 2010-01-01
Supplement: Additional file 1 [file 1476-072x-9-37-s1.doc]

**Additional file 1**

**Theoretical Power**

Data for Case 1 could be analyzed using a Pearson chi-square test. To provide a theoretical comparison of the power of the complex spatial hypothesis tests we computed the theoretical power of a Pearson chi-square test:

Where *ncp* is the noncentrality parameter equal to the sample size multiplied by the effect size, *w,* squared with

.

Here, and are the joint-probabilities of controls and and represent the joint-probabilities of cases living inside and outside the cluster, respectively. [1]

Data for Cases 2 and 3 could be appropriately analyzed using a logistic regression. To evaluate the performance of the spatial hypothesis tests, we computed the theoretical power of detecting an association between the occurrence of disease and a one standard deviation increase in distance from the exposure source, i.e. distance from the center of the study region for Case 2 and from the center of the horizontal axis for Case 3 (approximately 23 and 28% of the distance for Cases 2 and 3, respectively).

,

with

,

where

.

is the probability of a case at the mean distance from the center of the region. is the logodds for a distance that is one standard deviation further than the mean distance from the center of the region. [2, 3]

**References**

1. Cohen J: *Statistical power analysis for the behavioral sciences.* 2nd edn. Hillsdale, NJ: Earlbaum; 1988.

2. Agresti A: *An Introduction to Categorical Data Analysis.* New York: A Wiley-Interscience Publication; 1996.

3. Hsieh FY: **Sample size tables for logistic regression.** *Statistics in Medicine* 1989, **8:**795-802.
